# Supplementary material for: Identification and Functional Analysis of LncRNAs in Response to Seed Aging in Metasequoia glyptostroboides by Third Generation Sequencing Technology
Source: MDPI journal article supplement (doi:10.3390/f13101579), 2022-09-27
Supplement: s1 [file s1]

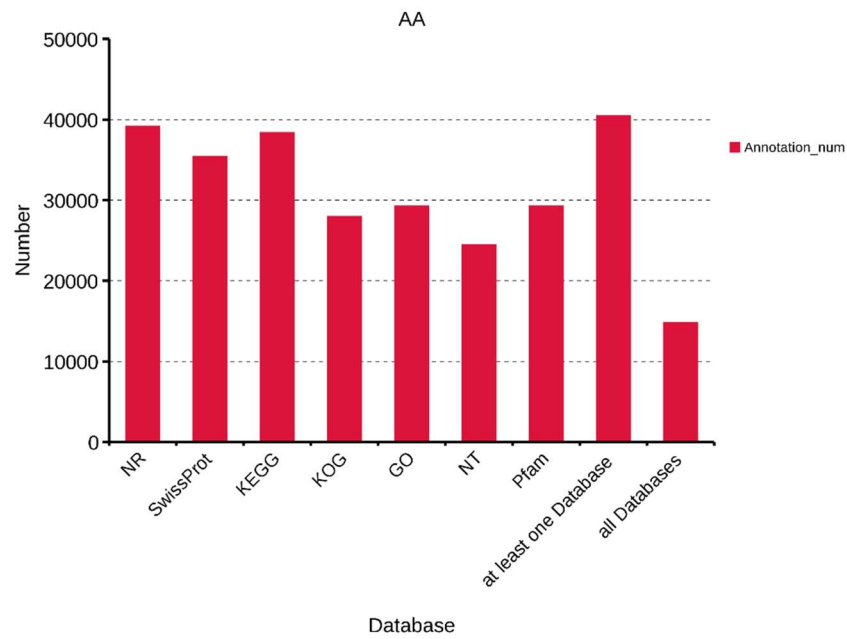

Figure S1 *M. glyptostroboides* long-read sequencing transcriptome annotation with different databases

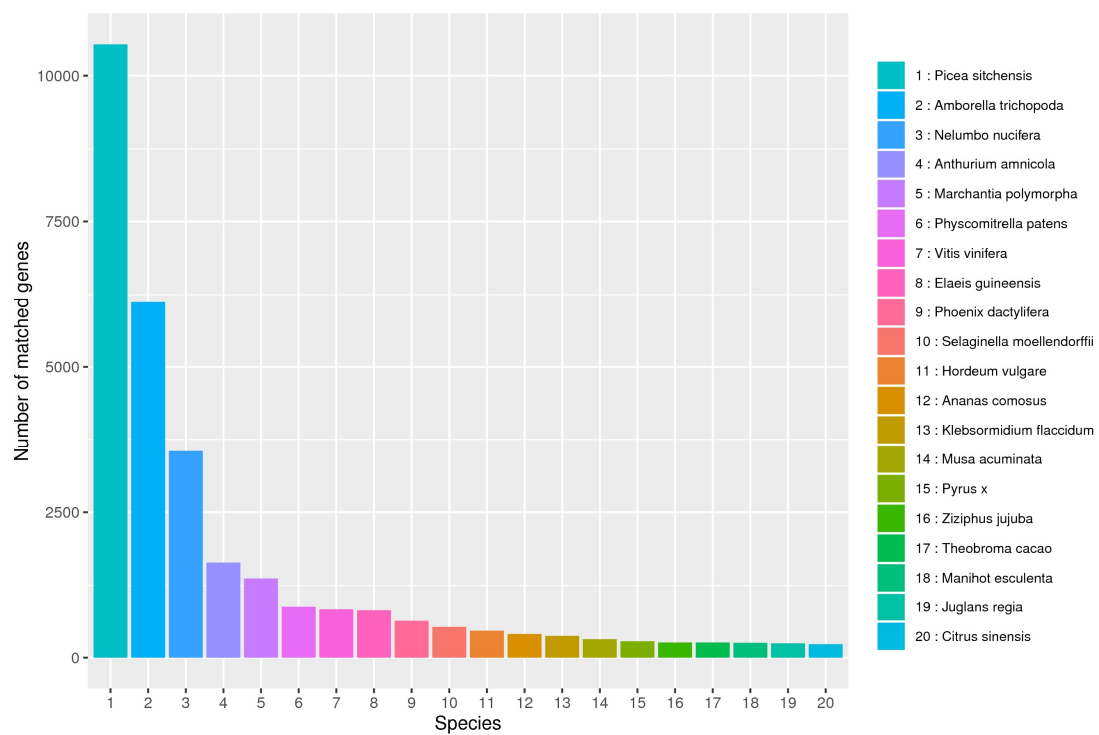

Figure S2 Homologous species distribution of *M. glyptostroboides* annotated in the NR database
